# Supplementary material for: Radiation and dual checkpoint blockade activate non-redundant immune mechanisms in cancer
Source: Springer Nature journal article supplement (doi:10.1038/nature14292), 2015-03-06
Supplement: 41586_2015_BFnature14292_MOESM251_ESM.pdf [file 41586_2015_BFnature14292_MOESM251_ESM.pdf]

## SUPPLEMENTARY METHODS

**Antibodies for flow cytometry.** Antibodies for flow cytometry used in the mouse and human experiments are provided in the tables below.

| MOUSE EXPERIMENTS     |          |                    |                   |
|-----------------------|----------|--------------------|-------------------|
| Antibody              | Clone    | Fluorophore        | Company           |
| Rat IgG <sub>2a</sub> | B39-4    | PE                 | BD Biosciences    |
| CD274                 | MIH5     | PE                 | BD Biosciences    |
| CD45.2                | 104      | BV570 and AF700    | Biolegend         |
| CD3                   | 17A2     | BV650              | Biolegend         |
| CD3                   | 145-2C11 | PE/Cy5             | Biolegend         |
| CD4                   | RM4-5    | V450               | BD Biosciences    |
| CD4                   | RM4-5    | PerCP-Cy5.5        | eBioscience       |
| CD8a                  | 53-6.7   | PE-CF594           | BD Biosciences    |
| CD8a                  | 53-6.7   | eFluor 450         | eBioscience       |
| B220                  | RA3-6B2  | APC eFluor 780     | eBioscience       |
| NK1.1                 | PK136    | APC eFluor 780     | eBioscience       |
| CD279                 | RMPI-30  | PE/Cy7             | Biolegend         |
| CD44                  | IM7      | BV785 and AF700    | Biolegend         |
| F4/80                 | BM8      | PE/Cy7             | Biolegend         |
| CD11c                 | HL3      | V450               | BD Biosciences    |
| CD11c                 | N418     | BV605              | Biolegend         |
| CD11b                 | M1/70    | PerCP-Cy5.5 and PE | BD Biosciences    |
| Ly-6G/Ly-6C           | RB6-8C5  | APC/Cy7            | BD Biosciences    |
| CD49b                 | DX5      | APC/Cy7            | Biolegend         |
| CD49b                 | DX5      | FITC               | BD Biosciences    |
| FOXP3                 | FJK-16s  | PE and APC         | eBioscience       |
| Eomes                 | Dan11Mag | eFluor 660         | eBioscience       |
| Ki67                  | B56      | FITC               | BD Biosciences    |
| Granzyme B            | GB11     | PE Texas Red       | Life Technologies |

| HUMAN EXPERIMENTS |          |                      |                |
|-------------------|----------|----------------------|----------------|
| Antibody          | Clone    | Fluorophore          | Company        |
| CD14              | M5E2     | BD Horizon V500      | BD Biosciences |
| CD16              | 3G8      | BD Horizon V500      | BD Biosciences |
| CD19              | HIB19    | BD Horizon V500      | BD Biosciences |
| CD3               | OKT-3    | Qdot 585             | NA             |
| CD45RA            | MEM-56   | Qdot 605             | Invitrogen     |
| CD4               | RPA-T4   | eFluor 650 NC        | eBioscience    |
| PD1               | EH12.2H7 | Brilliant Violet 711 | BioLegend      |
| CD27              | O323     | Brilliant Violet 785 | Biolegend      |
| Granzyme B        | GB11     | PE-Texas Red         | Invitrogen     |
| Ki67              | B56      | Alexa Fluor 700      | BD Biosciences |
| CD8               | RPA-T8   | APC-eFluor 780       | eBioscience    |

**Guide RNA sequences.** Gene block contains 20 bp target size (N), U6 promoter, gRNA scaffold, and termination signal. The sequence and sequences for each guide used are as follows.

```
TGTACAAAAAAGCAGGCTTTAAAGGAACCAATTCAGTCGACTGGATCCGGTACCAAGGTCG
GGCAGGAAGAGGGCCTATTTCCCATGATTCCTTCATATTTGCATATACGATACAAGGCTGT
TAGAGAGATAATTAGAATTAATTTGACTGTAAACACAAAGATATTAGTACAAAATACGTGAC
GTAGAAAGTAATAATTTCTTGGGTAGTTTGCAGTTTTAAATTTAAATGGACTATC
ATATGCTTACCGTAACTTGAAAGTATTTGATTTCTTGGCTTTATATATCTTGTGGAAAGGAC
GAAACACCGNNNNNNNNNNNNNNNNNNNNNGTTTTAGAGCTAGAAATAGCAAGTTAAAATAAG
GCTAGTCCGTTATCAACTTGAAAAAGTGGCACCGAGTCGGTGCTTTTTTTCTAGACCCAGC
TTTCTTGTACAAAGTTGGCATT
```

**G1:** GGCTCCAAAGGACTTGTACG  
**G2:** GACTTGTACGTGGTGGAGTA  
**G3:** GTATGGCAGCAACGTCACGA
